# Supplementary material for: Simultaneous multiply-accumulate operations in optical computing by Jacobi time-wave packets
Source: Research Square preprint supplement (doi:10.21203/rs.3.rs-7572267/v1), 2025-09-10
Supplement: Supplementary file 1 [file 2e8a7eeaae41caaca3e6fdbc.pdf]

# Supplemental Material for: Simultaneous multiply-accumulate operations in optical computing by Jacobi time-wave packets

## Part 1: Recursive Equation Systems for the Jacobi Pulse Sequences (JPSs)

The recursive equation system for the Jacobi polynomials  $JP_n^{4,4}(t)$  is represented by

$$JP_0^{4,4}(t) = 1 \quad (1)$$

for the first polynomial,

$$JP_1^{4,4}(t) = \left( \frac{(2n+7) \cdot (n+4) \cdot t \cdot JP_{n-1}^{4,4}(t)}{(n+8) \cdot n} \right)_{n=1} = 5t \cdot JP_0^{4,4}(t) = 5t \quad (2)$$

for the second and

$$JP_n^{4,4}(t) = \frac{(2n+7) \cdot (n+4) \cdot t \cdot JP_{n-1}^{4,4}(t)}{(n+8) \cdot n} - \frac{\Gamma(n+5) \cdot JP_{n-2}^{4,4}(t)}{(n+8) \cdot n \cdot \Gamma(n+3)} \quad (3)$$

For  $n \geq 2$ .

In analogy, the orders of the Jacobi pulses (JCP) can be calculated as:

$$JCP_0(t) = \frac{3}{16} \sqrt{35} \cdot (t^2 - 1)^2 \cdot \Pi(t) \quad (4)$$

for the first,

$$JCP_1(t) = \left( \frac{(2n+9)^{1/2} \cdot (2n+7)^{1/2} \cdot t \cdot JCP_{n-1}(t)}{(n+8)^{1/2} \cdot n^{1/2}} \right)_{n=1} = \sqrt{11} \cdot t \cdot JCP_0(t) \\ = \frac{3}{16} \sqrt{385} \cdot t \cdot (t^2 - 1)^2 \cdot \Pi(t) \quad (5)$$

for the second and

$$JCP_n(t) = \frac{(2n+9)^{1/2} \cdot (2n+7)^{1/2} \cdot t \cdot JCP_{n-1}(t)}{(n+8)^{1/2} \cdot n^{1/2}} - \frac{(2n+9)^{1/2} \Gamma(n+9)^{1/2} \cdot \Gamma(n+1)^{1/2} \cdot JCP_{n-2}(t)}{(n+8) \cdot n \cdot (2n+5)^{1/2} \Gamma(n+7)^{1/2} \cdot \Gamma(n-1)^{1/2}} \quad (6)$$

for  $n \geq 2$ . Here  $\Pi(t)$  is a rectangular function with 1 between  $t = -1$  and  $t = 1$ ,  $\frac{1}{2}$  for  $|t| = 1$  and 0 elsewhere.

Let

$$JPS_{n,\Delta f}(t) := 2^{1/2} \Delta f^{1/2} \sum_{m=-\infty}^{\infty} JCP_n(2\Delta f \cdot t - 2m) \quad (7)$$

be the unmodulated JCP sequence associated with the repetition frequency  $\Delta f$ . Than the recursive equation system for the Jacobi pulse sequences (JPS) is:

$$JPS_{0,\Delta f}(t) = 2^{1/2} \Delta f^{1/2} \sum_{m=-\infty}^{\infty} JCP_0(2\Delta f \cdot t - 2m), \quad (8)$$

for the first

$$JPS_{1,\Delta f}(t) = \left( \frac{(2n+9)^{1/2} \cdot (2n+7)^{1/2} ST_{\Delta f}(t) \cdot S_{n-1,\Delta f}(t)}{(n+8)^{1/2} \cdot n^{1/2}} \right)_{n=1} = \sqrt{11} \cdot ST_{\Delta f}(t) \cdot JPS_{0,\Delta f}(t) \\ = 2^{1/2} \Delta f^{1/2} \sum_{m=-\infty}^{\infty} JCP_1(2\Delta f \cdot t - 2m) \quad (9)$$

for the second and

$$JPS_{n,\Delta f}(t) = \frac{(2n+9)^{1/2} \cdot (2n+7)^{1/2} ST_{\Delta f}(t) \cdot JPS_{n-1,\Delta f}(t)}{(n+8)^{1/2} \cdot n^{1/2}} - \frac{(2n+9)^{1/2} \Gamma(n+9)^{1/2} \cdot \Gamma(n+1)^{1/2} \cdot JPS_{n-2,\Delta f}(t)}{(n+8) \cdot n \cdot (2n+5)^{1/2} \Gamma(n+7)^{1/2} \cdot \Gamma(n-1)^{1/2}} \quad (10)$$

for  $n \geq 2$ . With  $ST_{\Delta f}(t)$  as a triangular-shaped sawtooth wave defined via a modulo function as:

$$ST_{\Delta f}(t) := 2 \text{Mod} \left( \Delta f \cdot t - \frac{1}{2}, 1 \right) - 1. \quad (11)$$

The first order JPS can be generated from the zeroth order Eq. (9), and all higher order modes only require the two previous modes  $JPS_{n-1,\Delta f}(t)$  and  $JPS_{n-2,\Delta f}(t)$  and a sawtooth signal  $ST_{\Delta f}(t)$ . All other factors in Eq. (10)

are time-independent and as such only numbers. Therefore, all JPS modes can be generated by simple analog electronics from the zeroth order and a sawtooth signal as input.

## Part 2: Scalar Product Operation or MAC Operation Utilizing Jacobi Polynomial Pulses

The Jacobi pulse sequences are given by:

$$\text{JPS}_{n,\Delta f}(t) := 2^{1/2} \Delta f^{1/2} \sum_{m=-\infty}^{\infty} \text{JCP}_n(2\Delta f \cdot t - 2m) \quad (7)$$

with  $n$  as the order of the sequence and  $\Delta f$  as the repetition rate. For the scalar product, the signal before the integration filter can be described by

$$s_{\Delta f}(t) = \left( \sum_{p=0}^N \text{data1}_p(t) \cdot \text{JPS}_{p,\Delta f}(t) \right) \sum_{p=0}^N \text{data2}_p(t) \cdot \text{JPS}_{p,\Delta f}(t) . \quad (12)$$

$\text{data}_p(t)$  are the rectangular-shaped data signals to be added up. The filter transfer can be described by a sinc function, here defined as:

$$\text{Sinc}(f) := \begin{cases} \frac{\text{Sin}(2\pi f)}{2\pi f}, & f \neq 0 \\ 1, & f = 0 \end{cases} . \quad (13)$$

resulting in the filter function:

$$\text{Filter}_{\Delta f}(f) = \frac{\text{Sinc}\left(\frac{f}{2\Delta f}\right)}{\Delta f} . \quad (14)$$

With the forward  $\mathbf{F}_t$  and backward Fourier transform  $\mathbf{F}_f^{-1}$ , the filtered signal at the time instance  $t_v$  can be expressed as:

$$x_{\Delta f}(t_v) = \left[ \mathbf{F}_f^{-1} \left( \left[ \mathbf{F}_t \left( s_{\Delta f}(t) \right) \right] (f) \cdot \text{Filter}_{\Delta f}(f) \right) \right] (t_v) , \quad (15)$$

where

$$t_v = \frac{v}{\Delta f} \quad (16)$$

are the centred data points of the rectangular-shaped data signals for  $v \in \mathbb{Z}$ . After applying the convolution theorem, Eq. (15) becomes:

$$\begin{aligned} x_{\Delta f}(t_v) &= \int_{-\infty}^{\infty} s_{\Delta f}(t_v - \tau) \cdot \Pi(2\Delta f \cdot \tau) d\tau \\ &= \int_{-\infty}^{\infty} \left( \sum_{p=0}^N \text{data1}_p(t_v - \tau) \cdot \text{JPS}_{p,\Delta f}(t_v - \tau) \right) \sum_{p=0}^N \text{data2}_p(t_v - \tau) \cdot \text{JPS}_{p,\Delta f}(t_v - \tau) \cdot \Pi(2\Delta f \cdot \tau) d\tau \end{aligned} \quad (17)$$

Since the rectangular function is zero outside of its range, this can be simplified to

$$x_{\Delta f}(t_v) = \int_{-1/(2\Delta f)}^{1/(2\Delta f)} \left( \sum_{p=0}^N \text{data1}_p(t_v - \tau) \cdot \text{JPS}_{p,\Delta f}(t_v - \tau) \right) \sum_{p=0}^N \text{data2}_p(t_v - \tau) \cdot \text{JPS}_{p,\Delta f}(t_v - \tau) d\tau . \quad (18)$$

Now,  $\Delta f$  for the integration range can be replaced by  $1/T$  with the symbol duration  $T$  and the signum of  $\tau$  can be changed without changing the integral for symmetry reasons leading to

$$x_{\Delta f}(t_v) = \int_{-T/2}^{T/2} \left( \sum_{p=0}^N \text{data1}_p(t_v + \tau) \cdot \text{JPS}_{p,\Delta f}(t_v + \tau) \right) \sum_{p=0}^N \text{data2}_p(t_v + \tau) \cdot \text{JPS}_{p,\Delta f}(t_v + \tau) d\tau . \quad (19)$$

In the next step, we can omit the  $t_v$  terms in the pulse sequences because of their periodicity, which gives

$$x_{\Delta f}(t_v) = \int_{-T/2}^{T/2} \left( \sum_{p=0}^N \text{data1}_p(t_v + \tau) \cdot \text{JPS}_{p,\Delta f}(\tau) \right) \sum_{p=0}^N \text{data2}_p(t_v + \tau) \cdot \text{JPS}_{p,\Delta f}(\tau) d\tau . \quad (20)$$

Additionally, the  $\tau$  term for the data signals can be omitted due to the fact that  $t_v$  describes a centred data point of a rectangular-shaped data signal and does therefore not vary inside the integral range. So, we get

$$x_{\Delta f}(t_v) = \int_{-T/2}^{T/2} \left( \sum_{p=0}^N \text{data1}_p(t_v) \cdot \text{JPS}_{p,\Delta f}(\tau) \right) \sum_{p=0}^N \text{data2}_p(t_v) \cdot \text{JPS}_{p,\Delta f}(\tau) d\tau$$

$$\begin{aligned}
&= \int_{-T/2}^{T/2} \left( \sum_{p=0}^N data1_p(t_v) \cdot 2^{1/2} \Delta f^{1/2} \sum_{m=-\infty}^{\infty} JCP_p(2\Delta f \cdot \tau - 2m) \right) \sum_{p=0}^N data2_p(t_v) \cdot \\
&2^{1/2} \Delta f^{1/2} \sum_{m=-\infty}^{\infty} JCP_p(2\Delta f \cdot \tau - 2m) d\tau,
\end{aligned} \tag{21}$$

whereby we also inserted the definition of the JCP sequences. The  $\tau$  range of the integral is centred around zero and according to its length it follows, that from the sums with index  $m$  only  $m = 0$  is inside the integration range. Hence, it results to:

$$\begin{aligned}
x_{\Delta f}(t_v) &= \int_{-T/2}^{T/2} \left( \sum_{p=0}^N data1_p(t_v) \cdot 2^{1/2} \Delta f^{1/2} \cdot JCP_p(2\Delta f \cdot \tau) \right) \sum_{p=0}^N data2_p(t_v) \cdot \\
&2^{1/2} \Delta f^{1/2} \cdot JCP_p(2\Delta f \cdot \tau) d\tau.
\end{aligned} \tag{22}$$

Utilizing the orthogonality of the JCPs this further reduces to

$$\begin{aligned}
x_{\Delta f}(t_v) &= \int_{-T/2}^{T/2} 2\Delta f \sum_{p=0}^N data1_p(t_v) \cdot data2_p(t_v) \cdot JCP_p(2\Delta f \cdot \tau) \cdot JCP_p(2\Delta f \cdot \tau) d\tau \\
&= \sum_{p=0}^N data1_p(t_v) \cdot data2_p(t_v),
\end{aligned} \tag{23}$$

which exactly corresponds to the required functionality of the scalar product operation or MAC operation at any time instance  $t_v$ .
